# Supplementary material for: Effect of elemental diet combined with infliximab dose escalation in patients with Crohn's disease with loss of response to infliximab: CERISIER trial
Source: PubMed Central journal article supplement — Intest Res. 2018 Jul 27;16(3):494–8. doi: 10.5217/ir.2018.16.3.494 (PMC6077314; doi:10.5217/ir.2018.16.3.494), 2018-07-27
Supplement: ir-16-494-s002.pdf [file ir-16-494-s002.pdf]

See "Effect of elemental diet combined with infliximab dose escalation in patients with Crohn's disease with loss of response to infliximab: CERISIER trial" on page 494.

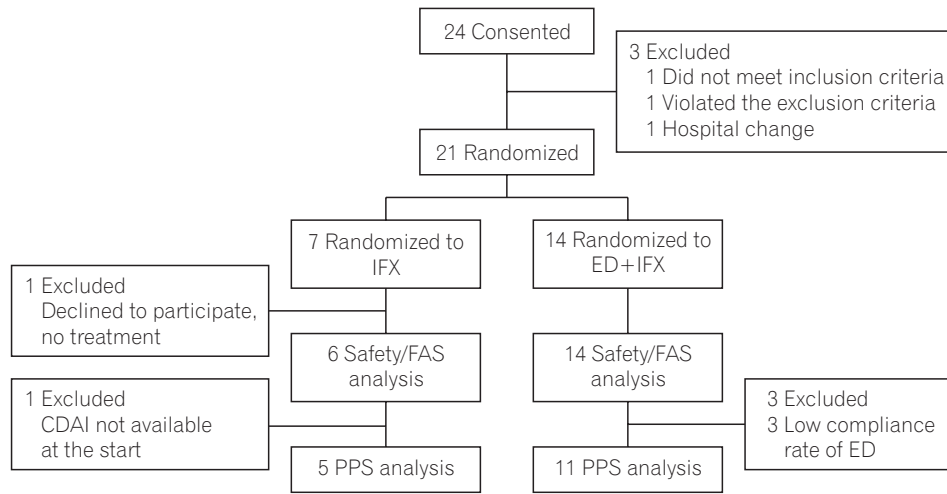

Supplementary Fig. 2. Patient flow diagram. IFX, infliximab; ED, elemental diet; FAS, full analysis set; PPS, per-protocol set.
