# Supplementary material for: Effect of elemental diet combined with infliximab dose escalation in patients with Crohn's disease with loss of response to infliximab: CERISIER trial
Source: PubMed Central journal article supplement — Intest Res. 2018 Jul 27;16(3):494–8. doi: 10.5217/ir.2018.16.3.494 (PMC6077314; doi:10.5217/ir.2018.16.3.494), 2018-07-27
Supplement: ir-16-494-s003.pdf [file ir-16-494-s003.pdf]

See “Effect of elemental diet combined with infliximab dose escalation in patients with Crohn’s disease with loss of response to infliximab: CERISIER trial” on page 494.

**Supplementary Table 1.** Adverse Events

|                                                      | IFX mono group (n=6) | ED+IFX group (n=14) |
|------------------------------------------------------|----------------------|---------------------|
| Summary of adverse events                            |                      |                     |
| Study drug-related adverse events                    |                      |                     |
| Death                                                | 0                    | 0                   |
| Serious adverse events                               | 0                    | 0                   |
| Adverse events leading to treatment discontinuation  | 1 (16.7)             | 0                   |
| Common adverse events                                |                      |                     |
| Infections and infestations                          |                      |                     |
| Influenza                                            | -                    | 1 (7.1)             |
| Upper respiratory tract infection                    | 2 (33.3)             | -                   |
| Pharyngitis                                          | 1 (16.7)             | -                   |
| Common cold                                          | 1 (16.7)             | 6 (42.9)            |
| Herpes labialis                                      | -                    | 1 (7.1)             |
| General disorders and administration site conditions |                      |                     |
| Chills                                               | -                    | 1 (7.1)             |
| Pyrexia                                              | -                    | 3 (21.4)            |
| Malaise                                              | 2 (33.3)             | -                   |
| Nervous system disorders                             |                      |                     |
| Headache                                             | 1 (16.7)             | -                   |
| Gastrointestinal disorders                           |                      |                     |
| Abdominal pain                                       | 2 (33.3)             | -                   |
| Cheilitis                                            | 1 (16.7)             | -                   |
| Diarrhoea                                            | 2 (33.3)             | -                   |
| Condition aggravated                                 | -                    | 1 (7.1)             |
| Eye disorders                                        |                      |                     |
| Eyelid oedema                                        | 1 (16.7)             | -                   |
| Conjunctivitis                                       | 1 (16.7)             | -                   |
| Respiratory, thoracic and mediastinal disorders      |                      |                     |
| Epistaxis                                            | -                    | 1 (7.1)             |
| Reproductive system and breast disorders             |                      |                     |
| Genital haemorrhage                                  | -                    | 1 (7.1)             |
| Musculoskeletal and connective tissue disorders      |                      |                     |
| Ligament sprain                                      | -                    | 1 (7.1)             |

Values are presented as number (%). IFX, infliximab; ED, elemental diet.
